# Supplementary material for: PanTE: A Comprehensive Framework for Transposable Element Discovery in Graph-based Pangenomes
Source: Research Square preprint supplement (doi:10.21203/rs.3.rs-5867196/v1), 2025-02-05
Supplement: Supplementary file 1 [file 4d0236c4f93fcbcb25c92b7c.xlsx]

## Sheet: Supplementary Table 1
Supplementary Table 1. Details of the simulation and the performance of each method. *The denominator of Actual Within-population Diversity was calculated by integrating sequences from five independent samplings with 1200 sequences per time.
TE Contents	Expected Within-population Diversity	Actual Within-population Diversity*	Genome Label	Single Libraries (RepeatModeler2)							Pan-libraries (RepeatModeler2 + cd-hit-est)							Single Libraries (PanTE)							Pan-libraries (PanTE + cd-hit-est)
				Ground-truth TE Quantity	True Positives with Respect to the Simulated Ground-truth Library	True Positives with Respect to the Method-generated Library	Detected TE Quantity	Recall	Precision	F1-score	Ground-truth TE Quantity	True Positives with Respect to the Simulated Ground-truth Library	True Positives with Respect to the Method-generated Library	Detected TE Quantity	Recall	Precision	F1-score	Ground-truth TE Quantity	True Positives with Respect to the Simulated Ground-truth Library	True Positives with Respect to the Method-generated Library	Detected TE Quantity	Recall	Precision	F1-score	Ground-truth TE Quantity	True Positives with Respect to the Simulated Ground-truth Library	True Positives with Respect to the Method-generated Library	Detected TE Quantity	Recall	Precision	F1-score
0.8	1200/1400	1200/1400	Genome 1	1200	715	1564	1587	0.595833	0.985507	0.742659	1400	1218	1997	2056	0.87	0.971304	0.917865	1200	1194	1024	1103	0.995	0.928377	0.960535	1400	1398	1590	1681	0.998571	0.945866	0.971504
			Genome 2	1200	690	1579	1595	0.575	0.989969	0.727468								1200	1199	1077	1156	0.999167	0.931661	0.964234
			Genome 3	1200	707	1609	1629	0.589167	0.987723	0.738077								1200	1178	1319	1319	0.981667	1	0.990749
			Genome 4	1200	702	1588	1601	0.585	0.99188	0.735947								1200	1169	1322	1322	0.974167	1	0.986914
			Genome 5	1200	679	1585	1599	0.565833	0.991245	0.720425								1200	1162	1349	1349	0.968333	1	0.983912
	1200/1600	1200/1600	Genome 1	1200	693	1530	1547	0.5775	0.989011	0.729205	1600	1357	2244	2308	0.848125	0.97227	0.905965	1200	1199	1047	1121	0.999167	0.933988	0.965478	1600	1598	2132	2314	0.99875	0.921348	0.958489
			Genome 2	1200	724	1536	1546	0.603333	0.993532	0.750759								1200	1198	1102	1179	0.998333	0.93469	0.965464
			Genome 3	1200	712	1549	1558	0.593333	0.994223	0.743162								1200	1200	1067	1135	1	0.940088	0.969119
			Genome 4	1200	745	1553	1562	0.620833	0.994238	0.76437								1200	1199	1054	1129	0.999167	0.93357	0.965255
			Genome 5	1200	672	1584	1600	0.56	0.99	0.715355								1200	1198	1067	1148	0.998333	0.929443	0.962657
	1200/1800	1200/1792	Genome 1	1200	711	1512	1531	0.5925	0.98759	0.74065	1792	1499	2464	2537	0.836496	0.971226	0.89884	1200	1200	1047	1107	1	0.945799	0.972145	1792	1792	2398	2545	1	0.94224	0.970261
			Genome 2	1200	723	1502	1515	0.6025	0.991419	0.749511								1200	1200	1004	1080	1	0.92963	0.963532
			Genome 3	1200	712	1512	1525	0.593333	0.991475	0.742393								1200	1200	1115	1168	1	0.954623	0.976785
			Genome 4	1200	724	1533	1548	0.603333	0.99031	0.749838								1200	1199	1001	1057	0.999167	0.94702	0.972395
			Genome 5	1200	725	1499	1524	0.604167	0.983596	0.748545								1200	1200	1076	1143	1	0.941382	0.969806
	1200/2000	1200/1980	Genome 1	1200	717	1616	1641	0.5975	0.984765	0.74374	1980	1595	2819	2894	0.805556	0.974084	0.88184	1200	1194	1048	1119	0.995	0.93655	0.964891	1980	1976	2208	2401	0.99798	0.919617	0.957197
			Genome 2	1200	721	1547	1562	0.600833	0.990397	0.747929								1200	1198	1086	1161	0.998333	0.935401	0.965843
			Genome 3	1200	731	1524	1537	0.609167	0.991542	0.754684								1200	1196	1030	1096	0.996667	0.939781	0.967388
			Genome 4	1200	695	1573	1591	0.579167	0.988686	0.730444								1200	1197	1118	1184	0.9975	0.944257	0.970148
			Genome 5	1200	708	1614	1634	0.59	0.98776	0.738742								1200	1197	1030	1095	0.9975	0.940639	0.968236
	1200/2200	1200/2156	Genome 1	1200	727	1611	1622	0.605833	0.993218	0.752602	2156	1717	3019	3085	0.796382	0.978606	0.87814	1200	1197	1273	1331	0.9975	0.956424	0.97653	2156	2156	2399	2591	1	0.925897	0.961523
			Genome 2	1200	715	1568	1584	0.595833	0.989899	0.743902								1200	1198	1060	1123	0.998333	0.9439	0.970354
			Genome 3	1200	739	1537	1555	0.615833	0.988424	0.758861								1200	1199	1102	1162	0.999167	0.948365	0.973103
			Genome 4	1200	745	1570	1587	0.620833	0.989288	0.762903								1200	1199	1016	1085	0.999167	0.936406	0.966769
			Genome 5	1200	691	1580	1594	0.575833	0.991217	0.728472								1200	1199	1073	1135	0.999167	0.945374	0.971527
0.7	1200/1400	1200/1400	Genome 1	1200	679	1579	1594	0.565833	0.99059	0.720252	1400	1194	2013	2070	0.852857	0.972464	0.908742	1200	1198	1116	1183	0.998333	0.943364	0.970071	1400	1399	1697	1795	0.999286	0.945404	0.971598
			Genome 2	1200	707	1541	1558	0.589167	0.989089	0.738459								1200	1199	1104	1169	0.999167	0.944397	0.97101
			Genome 3	1200	716	1557	1573	0.596667	0.989828	0.744531								1200	1197	1131	1189	0.9975	0.95122	0.97381
			Genome 4	1200	687	1619	1634	0.5725	0.99082	0.725692								1200	1197	1159	1229	0.9975	0.943043	0.969507
			Genome 5	1200	702	1616	1635	0.585	0.988379	0.734981								1200	1198	1118	1170	0.998333	0.955556	0.976476
	1200/1600	1200/1598	Genome 1	1200	708	1525	1538	0.59	0.991547	0.739798	1598	1353	2178	2237	0.846683	0.973625	0.905728	1200	1199	1137	1212	0.999167	0.938119	0.967681	1598	1597	1806	1952	0.999374	0.925205	0.96086
			Genome 2	1200	700	1523	1538	0.583333	0.990247	0.734178								1200	1195	1127	1188	0.995833	0.948653	0.971671
			Genome 3	1200	697	1551	1571	0.580833	0.987269	0.731379								1200	1198	1097	1165	0.998333	0.941631	0.969153
			Genome 4	1200	685	1568	1582	0.570833	0.99115	0.72444								1200	1199	1166	1230	0.999167	0.947967	0.972894
			Genome 5	1200	685	1550	1570	0.570833	0.987261	0.723398								1200	1199	1102	1167	0.999167	0.944302	0.97096
	1200/1800	1200/1790	Genome 1	1200	718	1544	1559	0.598333	0.990378	0.745984	1790	1476	2530	2589	0.824581	0.977211	0.894431	1200	1198	1065	1140	0.998333	0.934211	0.965208	1790	1790	2007	2198	1	0.913103	0.954578
			Genome 2	1200	719	1515	1527	0.599167	0.992141	0.747131								1200	1199	1107	1170	0.999167	0.946154	0.971938
			Genome 3	1200	696	1591	1607	0.58	0.990044	0.731477								1200	1197	1125	1177	0.9975	0.95582	0.976215
			Genome 4	1200	695	1591	1602	0.579167	0.993134	0.731654								1200	1198	1077	1136	0.998333	0.948063	0.972549
			Genome 5	1200	722	1502	1521	0.601667	0.987508	0.747748								1200	1199	1103	1168	0.999167	0.944349	0.970985
	1200/2000	1200/1983	Genome 1	1200	723	1634	1651	0.6025	0.989703	0.74902	1983	1582	2837	2908	0.797781	0.975585	0.877769	1200	1196	1135	1194	0.996667	0.950586	0.973081	1983	1982	2208	2377	0.999496	0.928902	0.962907
			Genome 2	1200	715	1563	1578	0.595833	0.990494	0.74407								1200	1195	1134	1208	0.995833	0.938742	0.966445
			Genome 3	1200	683	1635	1649	0.569167	0.99151	0.723192								1200	1197	1107	1181	0.9975	0.937341	0.966485
			Genome 4	1200	725	1565	1580	0.604167	0.990506	0.750537								1200	1195	1077	1135	0.995833	0.948899	0.9718
			Genome 5	1200	688	1587	1611	0.573333	0.985102	0.724819								1200	1196	1062	1141	0.996667	0.930762	0.962588
	1200/2200	1200/2157	Genome 1	1200	690	1639	1658	0.575	0.98854	0.727082	2157	1711	3011	3090	0.793231	0.974434	0.874545	1200	1197	1105	1171	0.9975	0.943638	0.969822	2157	2155	2377	2551	0.999073	0.931791	0.96426
			Genome 2	1200	719	1567	1589	0.599167	0.986155	0.745427								1200	1198	1097	1162	0.998333	0.944062	0.970439
			Genome 3	1200	749	1570	1584	0.624167	0.991162	0.765974								1200	1196	1107	1174	0.996667	0.94293	0.969054
			Genome 4	1200	716	1601	1617	0.596667	0.990105	0.74461								1200	1200	1126	1191	1	0.945424	0.971946
			Genome 5	1200	735	1528	1542	0.6125	0.990921	0.757055								1200	1198	1110	1184	0.998333	0.9375	0.966961
0.6	1200/1400	1200/1400	Genome 1	1200	674	1557	1578	0.561667	0.986692	0.715844	1400	1209	2022	2076	0.863571	0.973988	0.915463	1200	1195	1174	1228	0.995833	0.956026	0.975524	1400	1399	2108	2292	0.999286	0.919721	0.957854
			Genome 2	1200	694	1582	1597	0.578333	0.990607	0.730303								1200	1198	1148	1218	0.998333	0.942529	0.969629
			Genome 3	1200	666	1621	1641	0.555	0.987812	0.710697								1200	1195	1157	1218	0.995833	0.949918	0.972334
			Genome 4	1200	683	1577	1593	0.569167	0.989956	0.722778								1200	1197	1171	1242	0.9975	0.942834	0.969397
			Genome 5	1200	704	1570	1580	0.586667	0.993671	0.737758								1200	1193	1156	1200	0.994167	0.963333	0.978507
	1200/1600	1200/1595	Genome 1	1200	693	1549	1558	0.5775	0.994223	0.730617	1595	1312	2260	2324	0.822571	0.972461	0.891258	1200	1195	1207	1264	0.995833	0.954905	0.97494	1595	1595	2068	2214	1	0.934056	0.965904
			Genome 2	1200	698	1558	1577	0.581667	0.987952	0.732227								1200	1197	1242	1295	0.9975	0.959073	0.977909
			Genome 3	1200	693	1489	1508	0.5775	0.987401	0.728767								1200	1195	1257	1308	0.995833	0.961009	0.978111
			Genome 4	1200	670	1555	1566	0.558333	0.992976	0.714766								1200	1191	1212	1273	0.9925	0.952082	0.971871
			Genome 5	1200	665	1611	1621	0.554167	0.993831	0.711562								1200	1196	1232	1291	0.996667	0.954299	0.975023
	1200/1800	1200/1795	Genome 1	1200	688	1548	1572	0.573333	0.984733	0.724719	1795	1449	2557	2647	0.807242	0.965999	0.879514	1200	1195	1190	1240	0.995833	0.959677	0.977421	1795	1794	2303	2437	0.999443	0.945014	0.971467
			Genome 2	1200	693	1558	1574	0.5775	0.989835	0.729429								1200	1199	1175	1234	0.999167	0.952188	0.975112
			Genome 3	1200	699	1542	1560	0.5825	0.988462	0.733027								1200	1198	1163	1216	0.998333	0.956414	0.976924
			Genome 4	1200	711	1501	1515	0.5925	0.990759	0.74154								1200	1196	1196	1252	0.996667	0.955272	0.97553
			Genome 5	1200	708	1577	1595	0.59	0.988715	0.739008								1200	1199	1184	1245	0.999167	0.951004	0.974491
	1200/2000	1200/1985	Genome 1	1200	742	1560	1578	0.618333	0.988593	0.760807	1985	1570	2857	2929	0.790932	0.975418	0.873541	1200	1193	1153	1212	0.994167	0.95132	0.972272	1985	1981	2366	2512	0.997985	0.941879	0.969121
			Genome 2	1200	693	1586	1605	0.5775	0.988162	0.728974								1200	1196	1198	1268	0.996667	0.944795	0.970038
			Genome 3	1200	702	1533	1549	0.585	0.989671	0.735338								1200	1191	1181	1243	0.9925	0.950121	0.970848
			Genome 4	1200	705	1636	1650	0.5875	0.991515	0.737821								1200	1188	1215	1266	0.99	0.959716	0.974623
			Genome 5	1200	682	1595	1607	0.568333	0.992533	0.72279								1200	1194	1232	1292	0.995	0.95356	0.97384
	1200/2200	1200/2154	Genome 1	1200	697	1547	1563	0.580833	0.989763	0.732063	2154	1691	3039	3121	0.785051	0.973726	0.869269	1200	1193	1139	1197	0.994167	0.951546	0.972389	2154	2150	2508	2705	0.998143	0.927172	0.961349
			Genome 2	1200	707	1587	1600	0.589167	0.991875	0.739234								1200	1198	1168	1216	0.998333	0.960526	0.979065
			Genome 3	1200	733	1559	1574	0.610833	0.99047	0.75565								1200	1198	1174	1218	0.998333	0.963875	0.980802
			Genome 4	1200	699	1525	1540	0.5825	0.99026	0.733521								1200	1196	1173	1235	0.996667	0.949798	0.972668
			Genome 5	1200	698	1583	1604	0.581667	0.986908	0.73194								1200	1194	1231	1289	0.995	0.955004	0.974592
0.5	1200/1400	1200/1400	Genome 1	1200	667	1535	1549	0.555833	0.990962	0.712195	1400	1147	2060	2144	0.819286	0.960821	0.884427	1200	1191	1303	1346	0.9925	0.968053	0.980124	1400	1399	1960	2040	0.999286	0.960784	0.979657
			Genome 2	1200	657	1546	1563	0.5475	0.989123	0.704851								1200	1196	1242	1301	0.996667	0.95465	0.975206
			Genome 3	1200	653	1582	1605	0.544167	0.98567	0.70121								1200	1196	1264	1313	0.996667	0.962681	0.979379
			Genome 4	1200	659	1526	1545	0.549167	0.987702	0.705868								1200	1194	1235	1283	0.995	0.962588	0.978526
			Genome 5	1200	674	1579	1599	0.561667	0.987492	0.716055								1200	1195	1288	1333	0.995833	0.966242	0.980814
	1200/1600	1200/1600	Genome 1	1200	700	1478	1490	0.583333	0.991946	0.734645	1600	1434	2530	2613	0.89625	0.968236	0.930853	1200	1197	1285	1332	0.9975	0.964715	0.980833	1600	1588	2019	2149	0.9925	0.939507	0.965277
			Genome 2	1200	689	1489	1506	0.574167	0.988712	0.726461								1200	1198	1278	1320	0.998333	0.968182	0.983026
			Genome 3	1200	661	1538	1560	0.550833	0.985897	0.70678								1200	1197	1301	1341	0.9975	0.970172	0.983646
			Genome 4	1200	682	1520	1539	0.568333	0.987654	0.721493								1200	1197	1299	1345	0.9975	0.965799	0.981394
			Genome 5	1200	702	1486	1498	0.585	0.991989	0.735977								1200	1197	1276	1312	0.9975	0.972561	0.984873
	1200/1800	1200/1789	Genome 1	1200	688	1468	1487	0.573333	0.987223	0.725392	1789	1444	2486	2564	0.807155	0.969579	0.880943	1200	1194	1240	1284	0.995	0.965732	0.980148	1789	1767	2048	2198	0.987703	0.931756	0.958914
			Genome 2	1200	699	1441	1462	0.5825	0.985636	0.732249								1200	1197	1272	1312	0.9975	0.969512	0.983307
			Genome 3	1200	714	1496	1508	0.595	0.992042	0.743856								1200	1196	1269	1314	0.996667	0.965753	0.980967
			Genome 4	1200	679	1494	1512	0.565833	0.988095	0.719592								1200	1192	1285	1334	0.993333	0.963268	0.97807
			Genome 5	1200	686	1502	1520	0.571667	0.988158	0.724308								1200	1196	1199	1252	0.996667	0.957668	0.976778
	1200/2000	1200/1986	Genome 1	1200	699	1555	1579	0.5825	0.984801	0.732018	1986	1554	2877	2972	0.782477	0.968035	0.865421	1200	1188	1318	1370	0.99	0.962044	0.975822	1986	1983	2249	2347	0.998489	0.958245	0.977953
			Genome 2	1200	681	1593	1611	0.5675	0.988827	0.721133								1200	1194	1285	1334	0.995	0.963268	0.978877
			Genome 3	1200	663	1595	1613	0.5525	0.988841	0.708908								1200	1191	1318	1358	0.9925	0.970545	0.9814
			Genome 4	1200	675	1603	1626	0.5625	0.985855	0.7163								1200	1193	1338	1374	0.994167	0.973799	0.983877
			Genome 5	1200	666	1576	1592	0.555	0.98995	0.711249								1200	1192	1324	1375	0.993333	0.962909	0.977885
	1200/2200	1200/2158	Genome 1	1200	696	1552	1569	0.58	0.989165	0.731237	2158	1655	3067	3158	0.766914	0.971184	0.857046	1200	1193	1278	1330	0.994167	0.960902	0.977251	2158	2156	2407	2503	0.999073	0.961646	0.980002
			Genome 2	1200	677	1555	1568	0.564167	0.991709	0.719195								1200	1194	1323	1364	0.995	0.969941	0.982311
			Genome 3	1200	698	1504	1521	0.581667	0.988823	0.732466								1200	1197	1247	1290	0.9975	0.966667	0.981841
			Genome 4	1200	690	1521	1538	0.575	0.988947	0.727191								1200	1196	1251	1305	0.996667	0.958621	0.977274
			Genome 5	1200	676	1510	1534	0.563333	0.984355	0.716578								1200	1197	1345	1398	0.9975	0.962089	0.979474
0.4	1200/1400	1200/1400	Genome 1	1200	579	1237	1248	0.4825	0.991186	0.649049	1400	1143	1983	2055	0.816429	0.964964	0.884504	1200	1111	2019	2022	0.925833	0.998516	0.960802	1400	1389	1689	1755	0.992143	0.962393	0.977042
			Genome 2	1200	576	1212	1224	0.48	0.990196	0.646572								1200	1142	2049	2051	0.951667	0.999025	0.974771
			Genome 3	1200	544	1209	1226	0.453333	0.986134	0.621129								1200	1191	1356	1389	0.9925	0.976242	0.984304
			Genome 4	1200	574	1272	1287	0.478333	0.988345	0.644665								1200	1141	2049	2057	0.950833	0.996111	0.972946
			Genome 5	1200	557	1165	1180	0.464167	0.987288	0.631458								1200	1136	2064	2071	0.946667	0.99662	0.971001
	1200/1600	1200/1600	Genome 1	1200	593	1159	1180	0.494167	0.982203	0.657521	1600	1269	2130	2209	0.793125	0.964237	0.870351	1200	1152	1943	1951	0.96	0.9959	0.97762	1600	1599	1762	1873	0.999375	0.940737	0.96917
			Genome 2	1200	588	1168	1182	0.49	0.988156	0.655136								1200	1193	1318	1347	0.994167	0.978471	0.986256
			Genome 3	1200	569	1168	1185	0.474167	0.985654	0.640304								1200	1190	1354	1387	0.991667	0.976208	0.983876
			Genome 4	1200	533	1143	1156	0.444167	0.988754	0.612974								1200	1190	1371	1395	0.991667	0.982796	0.987211
			Genome 5	1200	585	1184	1197	0.4875	0.98914	0.653112								1200	1127	2214	2220	0.939167	0.997297	0.967359
	1200/1800	1200/1794	Genome 1	1200	591	1128	1139	0.4925	0.990342	0.65785	1794	1375	2426	2493	0.766444	0.973125	0.857506	1200	1193	1360	1391	0.994167	0.977714	0.985872	1794	1790	1950	2041	0.99777	0.955414	0.976133
			Genome 2	1200	580	1128	1139	0.483333	0.990342	0.649621								1200	1190	1307	1342	0.991667	0.97392	0.982713
			Genome 3	1200	585	1178	1189	0.4875	0.990749	0.653462								1200	1193	1430	1461	0.994167	0.978782	0.986414
			Genome 4	1200	570	1197	1211	0.475	0.988439	0.641651								1200	1194	1320	1355	0.995	0.97417	0.984475
			Genome 5	1200	571	1139	1146	0.475833	0.993892	0.643558								1200	1185	1370	1399	0.9875	0.979271	0.983368
	1200/2000	1200/1977	Genome 1	1200	570	1233	1246	0.475	0.989567	0.641888	1977	1476	2646	2721	0.746586	0.972437	0.844675	1200	1183	1353	1396	0.985833	0.969198	0.977445	1977	1970	2180	2258	0.996459	0.965456	0.980713
			Genome 2	1200	572	1170	1185	0.476667	0.987342	0.642937								1200	1188	1360	1403	0.99	0.969351	0.979567
			Genome 3	1200	607	1176	1186	0.505833	0.991568	0.669918								1200	1189	1378	1419	0.990833	0.971106	0.980871
			Genome 4	1200	542	1148	1159	0.451667	0.990509	0.620424								1200	1186	1394	1429	0.988333	0.975507	0.981878
			Genome 5	1200	579	1216	1226	0.4825	0.991843	0.64919								1200	1185	1366	1403	0.9875	0.973628	0.980515
	1200/2200	1200/2167	Genome 1	1200	576	1195	1204	0.48	0.992525	0.647068	2167	1580	2829	2900	0.729119	0.975517	0.83451	1200	1190	1353	1390	0.991667	0.973381	0.982439	2167	2160	2365	2443	0.99677	0.968072	0.982211
			Genome 2	1200	577	1219	1233	0.480833	0.988646	0.646996								1200	1188	1402	1433	0.99	0.978367	0.984149
			Genome 3	1200	565	1154	1167	0.470833	0.98886	0.637926								1200	1185	1362	1393	0.9875	0.977746	0.982599
			Genome 4	1200	594	1202	1216	0.495	0.988487	0.659663								1200	1192	1357	1386	0.993333	0.979076	0.986153
			Genome 5	1200	569	1183	1195	0.474167	0.989958	0.641209								1200	1190	1363	1394	0.991667	0.977762	0.984665
0.3	1200/1400	1200/1400	Genome 1	1200	239	380	387	0.199167	0.981912	0.331162	1400	1047	1722	1781	0.747857	0.966873	0.843378	1200	1080	1292	1308	0.9	0.987768	0.941844	1400	1394	1683	1728	0.995714	0.973958	0.984716
			Genome 2	1200	213	343	352	0.1775	0.974432	0.300298								1200	1104	1267	1300	0.92	0.974615	0.946521
			Genome 3	1200	220	377	384	0.183333	0.981771	0.30897								1200	1091	1308	1327	0.909167	0.985682	0.945879
			Genome 4	1200	230	376	386	0.191667	0.974093	0.320308								1200	1106	1267	1291	0.921667	0.98141	0.9506
			Genome 5	1200	238	393	403	0.198333	0.975186	0.329627								1200	1102	1239	1268	0.918333	0.977129	0.946819
	1200/1600	1200/1597	Genome 1	1200	229	370	374	0.190833	0.989305	0.31995	1597	1123	1793	1854	0.703193	0.967098	0.814297	1200	1093	1317	1338	0.910833	0.984305	0.946145	1597	1582	1894	1915	0.990607	0.989034	0.98982
			Genome 2	1200	251	362	368	0.209167	0.983696	0.344979								1200	1088	1227	1247	0.906667	0.983962	0.943734
			Genome 3	1200	236	387	395	0.196667	0.979747	0.327578								1200	865	1670	1672	0.720833	0.998804	0.837352
			Genome 4	1200	261	356	365	0.2175	0.975342	0.355683								1200	876	1685	1687	0.73	0.998814	0.843508
			Genome 5	1200	251	359	370	0.209167	0.97027	0.344144								1200	892	1698	1699	0.743333	0.999411	0.852558
	1200/1800	1200/1789	Genome 1	1200	240	351	356	0.2	0.985955	0.332544	1789	1182	1979	2038	0.660704	0.97105	0.786365	1200	886	1679	1680	0.738333	0.999405	0.849258	1789	1714	2030	2050	0.958077	0.990244	0.973895
			Genome 2	1200	249	383	390	0.2075	0.982051	0.342609								1200	884	1726	1728	0.736667	0.998843	0.847952
			Genome 3	1200	239	349	357	0.199167	0.977591	0.330915								1200	854	1629	1631	0.711667	0.998774	0.831124
			Genome 4	1200	235	345	351	0.195833	0.982906	0.326596								1200	892	1715	1717	0.743333	0.998835	0.852349
			Genome 5	1200	232	386	393	0.193333	0.982188	0.323073								1200	890	1700	1701	0.741667	0.999412	0.851461
	1200/2000	1200/1978	Genome 1	1200	232	406	411	0.193333	0.987835	0.323377	1978	1231	2037	2098	0.622346	0.970925	0.758504	1200	898	1724	1724	0.748333	1	0.856053	1978	1844	2245	2265	0.932255	0.99117	0.96081
			Genome 2	1200	257	392	397	0.214167	0.987406	0.351988								1200	866	1662	1663	0.721667	0.999399	0.838124
			Genome 3	1200	263	389	399	0.219167	0.974937	0.357881								1200	864	1646	1649	0.72	0.998181	0.836571
			Genome 4	1200	241	380	389	0.200833	0.976864	0.33317								1200	881	1698	1699	0.734167	0.999411	0.846497
			Genome 5	1200	289	404	412	0.240833	0.980583	0.386694								1200	847	1659	1659	0.705833	1	0.827553
	1200/2200	1200/2152	Genome 1	1200	229	358	367	0.190833	0.975477	0.319218	2152	1274	2196	2254	0.592007	0.974268	0.736491	1200	878	1692	1694	0.731667	0.998819	0.844621	2152	2003	2399	2422	0.930762	0.990504	0.959704
			Genome 2	1200	228	358	361	0.19	0.99169	0.318901								1200	896	1750	1754	0.746667	0.997719	0.854127
			Genome 3	1200	209	354	360	0.174167	0.983333	0.29592								1200	882	1734	1736	0.735	0.998848	0.846848
			Genome 4	1200	245	392	400	0.204167	0.98	0.337931								1200	891	1727	1732	0.7425	0.997113	0.851174
			Genome 5	1200	240	380	387	0.2	0.981912	0.332313								1200	891	1715	1718	0.7425	0.998254	0.851589

## Sheet: Supplementary Table 3
Supplementary Table 3. Evaluation metrics for TE classification per family. *Sum indicates the radar area in Fig. 1e-g.
Classification Methods	TE Family	Precision	Recall	F1-score
ClassifyTE	BEL	0.69	0.8	0.74094
	CACTA	0.95	0.7	0.806061
	COPIA	0.8	0.83	0.814724
	GYPSY	0.56	0.58	0.569825
	HAT	0.76	0.68	0.717778
	HELITRON	0	0	0
	L1	0.78	0.9	0.835714
	L2	0	0	0
	MUDR	0.85	0.66	0.743046
	PIGGYBAC	0.77	0.51	0.613594
	R1	0	0	0
	R2	0.85	0.79	0.818902
	RTE	0.83	0.86	0.844734
	SINE	0.86	0.89	0.874743
	TC1	0	0	0
	Sum*	8.7	8.2	8.38006
Deep-TE	BEL	0	0	0
	CACTA	0.99	0.8	0.884916
	COPIA	0.82	0.81	0.814969
	GYPSY	0.24	0.71	0.358737
	HAT	0.62	0.94	0.747179
	HELITRON	0.96	0.88	0.918261
	L1	0.57	0.94	0.709669
	L2	0	0	0
	MUDR	0.84	0.75	0.792453
	PIGGYBAC	0	0	0
	R1	0	0	0
	R2	0	0	0
	RTE	0	0	0
	SINE	0.97	0.66	0.785521
	TC1	0.67	0.58	0.62176
	Sum*	6.68	7.07	6.63347
PanTE	BEL	0.85	0.88	0.86474
	CACTA	0.99	0.77	0.86625
	COPIA	0.9	0.9	0.9
	GYPSY	0.89	0.74	0.808098
	HAT	0.95	0.79	0.862644
	HELITRON	0.81	0.35	0.488793
	L1	0.98	0.99	0.984975
	L2	1	0.98	0.989899
	MUDR	0.98	0.65	0.781595
	PIGGYBAC	0.91	0.82	0.862659
	R1	1	0.97	0.984772
	R2	1	1	1
	RTE	0.95	0.98	0.964767
	SINE	0.88	0.93	0.904309
	TC1	0.92	0.44	0.595294
	Sum*	14.01	12.19	12.8588
RepeatModeler2 (RepeatClassifier)	BEL	1	0.34	0.507463
	CACTA	1	0.65	0.787879
	COPIA	1	0.57	0.726115
	GYPSY	0.95	0.55	0.696667
	HAT	1	0.45	0.62069
	HELITRON	0.81	0.35	0.488793
	L1	0.99	0.99	0.99
	L2	1	0.98	0.989899
	MUDR	1	0.43	0.601399
	PIGGYBAC	0.99	0.75	0.853448
	R1	1	0.97	0.984772
	R2	1	1	1
	RTE	0.99	0.98	0.984975
	SINE	0.83	0.05	0.0943182
	TC1	1	0.23	0.373984
	Sum*	14.56	9.29	10.7004
TERL	BEL	0.68	0.78	0.726575
	CACTA	0	0	0
	COPIA	0.39	0.78	0.52
	GYPSY	0.27	0.49	0.348158
	HAT	0.47	0.78	0.58656
	HELITRON	0	0	0
	L1	0.3	1	0.461538
	L2	0	0	0
	MUDR	0	0	0
	PIGGYBAC	0	0	0
	R1	0	0	0
	R2	0	0	0
	RTE	0	0	0
	SINE	0	0	0
	TC1	0.24	0.84	0.373333
	Sum*	2.35	4.67	3.01617

## Sheet: Supplementary Table 6
Supplementary Table 6. Recall for genome annotation using TEs per family identified through different methods.
Rice
TE Family	Helitron	Tourist	Stow	MULE	MULEtir	Gypsy	hAT	Copia	LINE	PILE	CACTA
Reference TE Regions in the Genome (bp)	13285593	11585600	8552989	21198176	1776887	73920591	6135187	13921069	5807481	1180062	8308115
PanTE	0.831591	0.957407	0.979161	0.89766	0.951327	0.988043	0.847071	0.974857	0.909303	0.684202	0.917066
RepeatModeler2	0.788186	0.957861	0.973185	0.844081	0.887682	0.971381	0.807865	0.924463	0.847557	0.607823	0.820324
EDTA	0.948539	0.989185	0.997369	0.939834	0.987415	0.990027	0.938098	0.979662	0.882902	0.754754	0.940507
Arabidopsis
TE Family	Helitron	LINE-1	MARINER	MuDR	SINE	TRNA	HARB	hAT	Gypsy	Copia
Reference TE Regions in the Genome (bp)	1808118	2385173	136457	1484163	54336	34251	699450	763031	2256213	1984402
PanTE	0.624392	0.56209	0.575515	0.579905	0.257417	0.906368	0.602199	0.661787	0.858107	0.813105
RepeatModeler2	0.548036	0.61985	0.817056	0.444808	0.468529	0.349917	0.544699	0.602817	0.676486	0.526134
EDTA	0.708358	0.622618	0.720579	0.606907	0.621356	0.581881	0.671149	0.721393	0.765025	0.84114
Grapevine
TE Family	Copia	Gypsy	HARB	hAT	LINE-1	MuDR
Reference TE Regions in the Genome (bp)	39898013	82630821	1791839	5822783	20144044	11384518
PanTE	0.991579	0.997636	0.987744	0.981558	0.994371	0.985846
RepeatModeler2	0.922393	0.984154	0.939279	0.935608	0.974971	0.880307
EDTA	0.984657	0.99078	0.964331	0.975001	0.964683	0.93291
Human
TE Family	hAT	Mariner	Endogenous	ERV	LINE-1	SINE	SAT
Reference TE Regions in the Genome (bp)	31573528	24224337	15600304	198717061	449941130	53234255	114881360
PanTE	0.538872	0.902982	0.791974	0.84314	0.934349	0.996707	0.990087
RepeatModeler2	0.748186	0.912904	0.796727	0.872665	0.925005	0.97984	0.985808
EDTA	0.686113	0.928429	0.847912	0.883443	0.919812	0.997456	0.990408
Maize
TE Family	Copia	Gypsy	ENSPM	hAT	Helitron	LINE-1	MuDR	HARB
Reference TE Regions in the Genome (bp)	306134921	834446876	57588087	24677731	21442153	16176938	19564548	21145345
PanTE	0.993711	0.997504	0.97668	0.898702	0.853864	0.941491	0.946799	0.915305
RepeatModeler2	0.975744	0.977137	0.872928	0.782263	0.657046	0.746739	0.840996	0.85532
EDTA	0.994896	0.994006	0.978159	0.971362	0.866909	0.923945	0.971509	0.961297
