# Supplementary material for: PanTE: A Comprehensive Framework for Transposable Element Discovery in Graph-based Pangenomes
Source: Research Square preprint supplement (doi:10.21203/rs.3.rs-5867196/v1), 2025-02-05
Supplement: Supplementary file 2 [file a10c06864a16baff0ca6b7f6.docx]

**Supplementary Material**

**Figures**


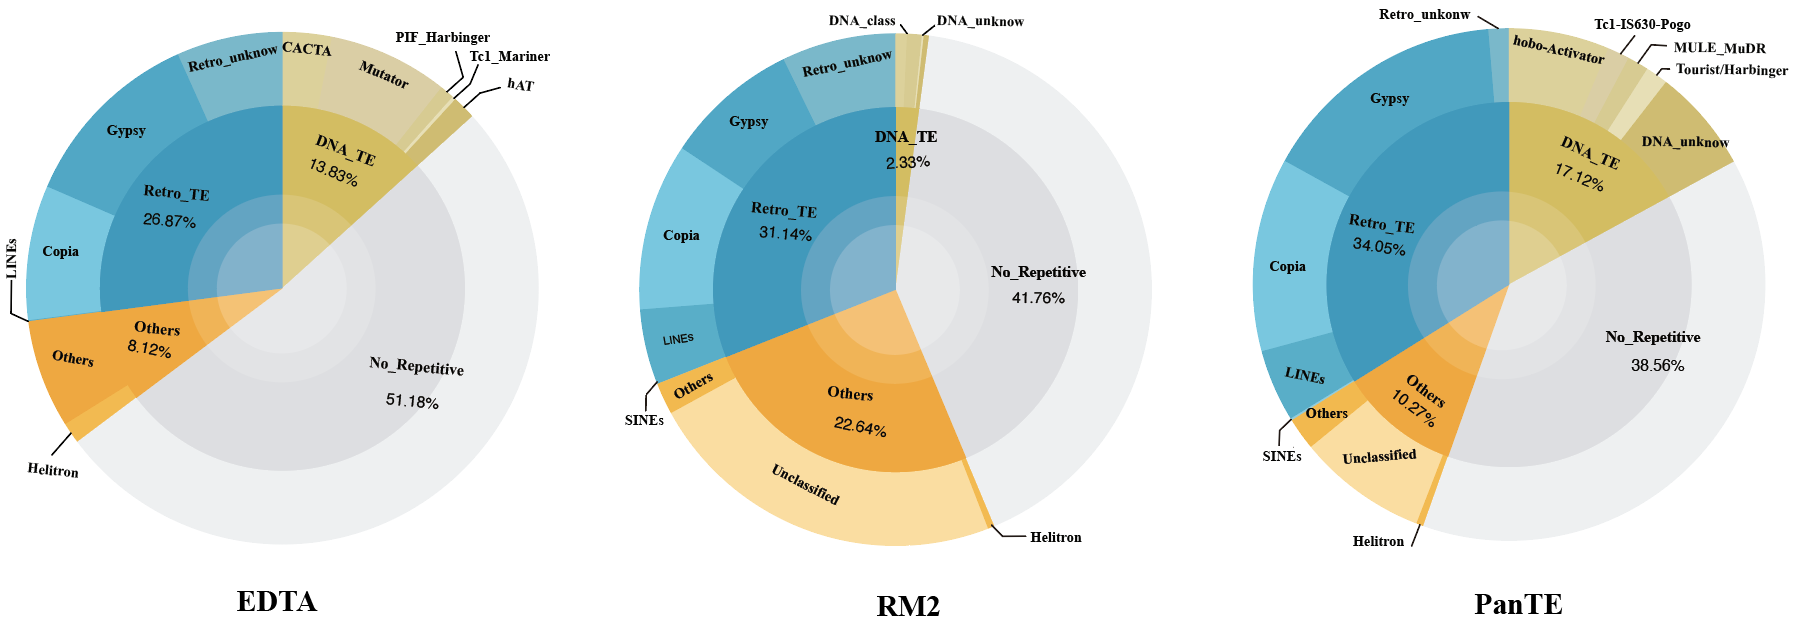


**Supplementary Fig. 1|**Annotation percentage of various TE families in the grapevine genome (GCF_030704535.1) using TEs identified through different methods.

**Tables**

**Supplementary Table 1.** Details of the simulation and the performance of each method: see Supplementary_tables.xlsx.

**Supplementary Table 2.** Evaluation metrics for TE classification globally.

|  | **ClassifyTE** | **Deep-TE** | **TERL** | **PanTE** | **RepeatModeler2 (RepeatClassifier)** |
| --- | --- | --- | --- | --- | --- |
| **Precision** | 0.544 | 0.418 | 0.111 | 0.876 | 0.910 |
| **Recall** | 0.547 | 0.418 | 0.311 | 0.813 | 0.619 |
| **F1-score** | 0.545 | 0.418 | 0.164 | 0.843 | 0.737 |

**Supplementary Table 3.** Evaluation metrics for TE classification per family: see Supplementary_tables.xlsx.

**Supplementary Table 4.** Recall for TE libraries generated by different methods. The number in () represents the true positive TE sequences with respect to the reference TE Library.

| **Species** | **Reference TE**  **Library Size** | **EDTA** | **RepeatModeler2** | **PanTE** |
| --- | --- | --- | --- | --- |
| **Human** | 737 | 0.182 (134) | 0.262 (193) | 0.225 (166) |
| **Rice** | 2431 | 0.540 (1313) | 0.160 (388) | 0.306 (743) |
| **Arabidopsis** | 2723 | 0.151 (412) | 0.046 (124) | 0.087 (238) |
| **Grapevine** | 556 | 0.561 (312) | 0.214 (119) | 0.603 (335) |
| **Maize** | 2053 | 0.478 (981) | 0.122 (251) | 0.399 (819) |

**Supplementary Table 5.** Recall for genome annotation using TEs identified through different methods.

| **Methods** | **Maize** | **Arabidopsis** | **Grapevine** | **Rice** | **Human** |
| --- | --- | --- | --- | --- | --- |
| **PanTE** | 0.99 | 0.88 | 0.99 | 0.95 | 0.93 |
| **RepeatModeler2** | 0.97 | 0.82 | 0.96 | 0.92 | 0.93 |
| **EDTA** | 0.99 | 0.82 | 0.98 | 0.97 | 0.93 |

**Supplementary Table 6.** Recall for genome annotation using TEs per family identified through different methods: see Supplementary_tables.xlsx.

**Supplementary Table 7.** TE libraries for various species generated by different methods.

| **EDTA** | | | |
| --- | --- | --- | --- |
| **Species** | **No. of TE Sequences** | **Average TE Length** | **No. of Low-frequency TEs (<10 Repeats)** |
| **Arabidopsis** | 1122 | 2680 | 488 |
| **Human** | 5809 | 2236 | 1680 |
| **Maize** | 17915 | 1855 | 6685 |
| **Rice** | 10585 | 2040 | 3710 |
| **Grapevine** | 3549 | 1565 | 792 |
| **RepeatModeler2** | | | |
| **Species** | **No. of TE Sequences** | **Average TE Length** | **No. of Low-frequency TEs (<10 Repeats)** |
| **Arabidopsis** | 472 | 1442 | 4 |
| **Human** | 969 | 626 | 5 |
| **Maize** | 1214 | 1256 | 9 |
| **Rice** | 2057 | 981 | 14 |
| **Grapevine** | 1216 | 1564 | 83 |
| **PanTE** | | | |
| **Species** | **No. of TE Sequences** | **Average TE Length** | **No. of Low-frequency TEs (<10 Repeats)** |
| **Arabidopsis** | 1299 | 2030 | 148 |
| **Human** | 1850 | 1333 | 86 |
| **Maize** | 3851 | 1939 | 85 |
| **Rice** | 4655 | 1070 | 257 |
| **Grapevine** | 5864 | 1107 | 216 |

**Supplementary Table 8.** Overlap of identified TEs between each pair of methods. The numbers on the diagonal represent the number of TEs identified by each corresponding method. The numbers off the diagonal represent the overlapping TEs with respect to the TEs detected by the method labelled in each row. For example, in Arabidopsis, EDTA detected 1122 TEs, of which 126 were also detected by RepeatModeler2 and 333 were detected by PanTE.

| **Arabidopsis** | | | | | | | |
| --- | --- | --- | --- | --- | --- | --- | --- |
|  | **EDTA** | | **RepeatModeler2** | | **PanTE** | | |
| **EDTA** | 1122 | | 126 | | 333 | | |
| **RepeatModeler2** | 184 | | 476 | | 261 | | |
| **PanTE** | 382 | | 296 | | 1299 | | |
| **Human** | | | | | | | |
|  | **EDTA** | | **RepeatModeler2** | | | **PanTE** | |
| **EDTA** | 5809 | | 126 | | | 175 | |
| **RepeatModeler2** | 219 | | 969 | | | 382 | |
| **PanTE** | 433 | | 531 | | | 1850 | |
| **Rice** | | | | | | | |
|  | **EDTA** | | **RepeatModeler2** | | | **PanTE** | |
| **EDTA** | 10585 | | 608 | | | 1173 | |
| **RepeatModeler2** | 955 | | 2057 | | | 958 | |
| **PanTE** | 2464 | | 1565 | | | 4655 | |
| **Maize** | | | | | | | | |
|  | | **EDTA** | | **RepeatModeler2** | | | **PanTE** | |
| **EDTA** | | 17915 | | 1993 | | | 4140 | |
| **RepeatModeler2** | | 733 | | 1214 | | | 756 | |
| **PanTE** | | 1922 | | 705 | | | 3851 | |
| **Grapevine** | | | | | | | | |
|  | | **EDTA** | | **RepeatModeler2** | | | **PanTE** | |
| **EDTA** | | 3507 | | 658 | | | 1261 | |
| **RepeatModeler2** | | 471 | | 1216 | | | 785 | |
| **PanTE** | | 1312 | | 983 | | | 5864 | |

**Supplementary Table 9.** Runtime of each method across different species genomes. 1The runtime of PanTE when applied to a rice pangenome to generate a pan-library of TEs. 2The runtime of panEDTA when performed on the individual genomes used to construct the pangenome to aggregate a pan-library. The number in () under each species represents its genome size.

|  | **RepeatModeler2** | **PanTE** | **EDTA** | **PanTE**  (Pangenome)1 | **panEDTA** (Individual Library Aggregation)2 |
| --- | --- | --- | --- | --- | --- |
| **Arabidopsis** (129Mb) | 31.38 h | 6.12 h | 18.45 h | \ | \ |
| **Rice** (374Mb) | 66.70 h | 26.82 h | 52.20 h | 50.40 h | 372.68 h |
| **Grapevine** (472Mb) | 24.45 h | 37.25 h | 123.80 h | \ | \ |
| **Maize** (2100Mb) | 35.87 h | 53.58 h | 524.78 h | \ | \ |
| **Human** (3000Mb) | 14.23 h | 50.80 h | 606.77 h | \ | \ |
| **Wheat** (4900Mb) | 52.63 h | 76.80 h | 1003.98 h | \ | \ |

**Supplementary Table 10.** The annotation percentage of the grapevine genome (GCF_030704535.1) by integrating multiple individual TE libraries.

| **No. of Individual Libraries** | **RepeatModeler2** (%) | **EDTA** (%) | **PanTE** (%) |
| --- | --- | --- | --- |
| **1** | 58.24 | 57.03 | 61.99 |
| **2** | 61.25 | 60.40 | 64.20 |
| **3** | 62.89 | 62.10 | 65.03 |
| **4** | 64.03 | 62.88 | 65.66 |
| **5** | 64.90 | 64.28 | 67.00 |
| **6** | 65.43 | 65.50 | 67.91 |
| **7** | 66.27 | 66.29 | 68.54 |
| **8** | 66.65 | 66.70 | 68.74 |

**Supplementary Table 11.** Links of rice genomes.

| **Link** | **Genome Number** |
| --- | --- |
| https://ftp.ensemblgenomes.ebi.ac.uk/pub/plants/release-58/fasta/oryza_nivara/dna/ | 1 |
| https://www.sciencedirect.com/science/article/pii/S1674205221002306 | 2 |
| https://ftp.ensemblgenomes.ebi.ac.uk/pub/plants/release-58/fasta/oryza_glumipatula/dna/ | 1 |
| https://ftp.ncbi.nlm.nih.gov/genomes/all/GCF/000/231/095/GCF_000231095.2_ObraRS2/ | 1 |
| https://ftp.ncbi.nlm.nih.gov/genomes/all/GCA/000/338/895/GCA_000338895.3_OmerRS3/ | 1 |
| https://www.ncbi.nlm.nih.gov/datasets/genome/GCF_034140825.1/ | 1 |

**Supplementary Table 12.** Recall for rice genome annotation (GCF_034140825.1) using pan-libraries of TEs generated through different methods. *PanTE was applied directly to the graph-based rice pangenome. The number in () represents the true positive TE regions identified with respect to the reference TE regions in the genome.

| **Mapping Parameters** | **panEDTA** | **PanTE*** | **Reference TE Regions** (bp) |
| --- | --- | --- | --- |
| **-div 20** | 0.866 (278399 bp) | 0.963 (309377 bp) | 321315 |
| **-div 40** | 0.939 (425501 bp) | 0.984 (445875 bp) | 453246 |
